# Supplementary material for: Activity-dependent isomerization of Kv4.2 by Pin1 regulates cognitive flexibility
Source: PubMed Central journal article supplement (PMC7099064; doi:10.1038/s41467-020-15390-x), 2020-03-26

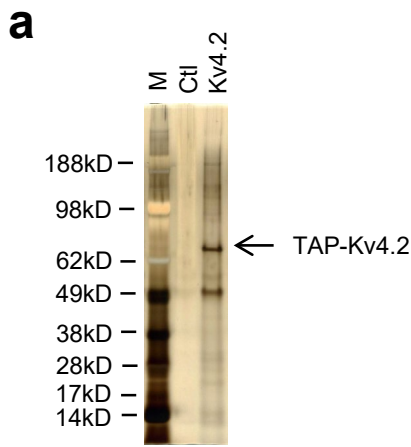

**b**

| Protein | Number of peptides (Unique) | Number of peptides (Total) | % of aa sequence coverage |
|---------|-----------------------------|----------------------------|---------------------------|
| Kv4.2   | 27                          | 126                        | 30.00%                    |
| Kv4.1   | 7                           | 11                         | 14.92%                    |
| Kv4.3   | 15                          | 17                         | 25.19%                    |
| DPP6    | 30                          | 40                         | 33.99%                    |
| DPP10   | 26                          | 26                         | 29.27%                    |
| KChIP1  | 9                           | 9                          | 22.47%                    |
| KChIP2  | 5                           | 5                          | 16.30%                    |
| KChIP3  | 6                           | 7                          | 35.94%                    |
| KChIP4  | 12                          | 16                         | 43.60%                    |

**e**

Pin1 sequence:

MADEEKLPQG WEKRMSRSSG RYYYYFNHITN  
 ASQWERPSGN SSSGGKNGQG EPARVRCSHL  
 LVKHSQSRPP SSWRQEKITR TKEEALELIN  
 GYIQKIKSGE EDFESLASQF SDCSSAKARG DL  
 GAFSRGQM QKPFEDASFA LRTGEMSGPV FT  
 DSGIHIL RTE

**f**

| Position | Peptide              | $\Delta$ corr | Xcorr |
|----------|----------------------|---------------|-------|
| 81-95    | TKEEALELINGYIQK      | 0.362         | 4.21  |
| 120-127  | GDLGAFSR             | 0.185         | 2.20  |
| 128-142  | GQMCKPFEDASFALR      | 0.482         | 3.63  |
| 143-163  | TGEMSGPVFTDSGIHILRTE | 0.509         | 4.54  |
| 143-161  | TGEMSGPVFTDSGIHILR   | 0.595         | 5.07  |

**c**

| Gene symbol | # of peptides (Unique) | # of peptides (Total) |
|-------------|------------------------|-----------------------|
| EIF3A       | 53                     | 56                    |
| DHX9        | 52                     | 54                    |
| CAND1       | 41                     | 42                    |
| SPTAN1      | 39                     | 39                    |
| EIF4G1      | 35                     | 39                    |
| EIF3B       | 33                     | 33                    |
| USP9X       | 32                     | 33                    |
| MYO6        | 30                     | 30                    |
| EIF4G2      | 29                     | 31                    |
| PSMD1       | 29                     | 29                    |
| MYH9        | 27                     | 27                    |
| CYFIP1      | 25                     | 27                    |
| MYH10       | 25                     | 26                    |
| KIF5B       | 25                     | 25                    |
| EIF3C       | 24                     | 25                    |
| SPTBN1      | 22                     | 22                    |
| AP3B1       | 21                     | 21                    |
| MYO1C       | 18                     | 18                    |
| ATP2B1      | 18                     | 18                    |
| UBE3C       | 18                     | 18                    |
| USP7        | 16                     | 16                    |
| PSMD2       | 15                     | 21                    |
| MYO1B       | 15                     | 15                    |
| PPP6R3      | 13                     | 13                    |
| ARHGFE2     | 13                     | 13                    |
| CLASP2      | 11                     | 19                    |
| USP24       | 11                     | 11                    |
| PIK3C2A     | 11                     | 11                    |
| AP2A1       | 10                     | 11                    |
| USP48       | 10                     | 10                    |
| PIK3R4      | 10                     | 10                    |
| USP10       | 10                     | 10                    |
| ARHGAP17    | 9                      | 10                    |
| KIF1A       | 9                      | 9                     |
| MYO1D       | 9                      | 9                     |
| AP1B1       | 8                      | 8                     |
| KIF11       | 8                      | 8                     |
| UBA52       | 7                      | 52                    |
| KIF5A       | 7                      | 7                     |
| PI4KA       | 7                      | 7                     |
| CAND2       | 7                      | 7                     |
| USP19       | 6                      | 6                     |
| ARHGFE1     | 6                      | 6                     |
| CYFIP2      | 6                      | 6                     |
| LARS2       | 6                      | 6                     |
| USP5        | 5                      | 11                    |
| USP15       | 5                      | 6                     |
| PPP6R1      | 5                      | 6                     |
| UBE2O       | 5                      | 5                     |
| UBE4B       | 5                      | 5                     |
| KIF23       | 5                      | 5                     |
| MYO1E       | 5                      | 5                     |
| CLASP1      | 5                      | 5                     |
| EIF4G3      | 5                      | 5                     |
| URB1        | 5                      | 5                     |
| ITCH        | 4                      | 4                     |
| XPO6        | 4                      | 4                     |
| RAB3GAP1    | 4                      | 4                     |
| PTPN23      | 4                      | 4                     |
| PPP4R1      | 3                      | 3                     |
| AP2A2       | 3                      | 3                     |
| ARFGEF1     | 3                      | 3                     |
| EIF2AK4     | 3                      | 3                     |

**d**

| Gene symbol | # of peptides (Unique) | # of peptides (Total) |
|-------------|------------------------|-----------------------|
| RPS18       | 25                     | 39                    |
| RPS9        | 17                     | 37                    |
| RPS19       | 16                     | 30                    |
| RPS16       | 16                     | 30                    |
| RPS7        | 15                     | 20                    |
| RPS25       | 13                     | 16                    |
| RPS13       | 12                     | 14                    |
| PSMB2       | 12                     | 12                    |
| RPS14       | 11                     | 14                    |
| PSMB1       | 11                     | 14                    |
| PSMB4       | 11                     | 13                    |
| PSMA2       | 11                     | 13                    |
| ARF1        | 11                     | 13                    |
| PMVK        | 11                     | 11                    |
| PSMA3       | 10                     | 10                    |
| PKM         | 9                      | 13                    |
| RAB7A       | 9                      | 12                    |
| RPL10       | 9                      | 11                    |
| RAB1A       | 9                      | 9                     |
| RPS11       | 9                      | 9                     |
| RPL9        | 8                      | 12                    |
| RHOA        | 8                      | 9                     |
| EIF5A       | 8                      | 9                     |
| RAB13       | 8                      | 8                     |
| RPS24       | 7                      | 12                    |
| UBE2M       | 7                      | 7                     |
| RAC1        | 7                      | 7                     |
| DTYMK       | 7                      | 7                     |
| UBA52       | 6                      | 10                    |
| PIN1        | 6                      | 6                     |
| RPS8        | 6                      | 6                     |
| PARK7       | 6                      | 6                     |
| RPS5        | 6                      | 6                     |
| MYL6        | 6                      | 6                     |
| ATP5F1      | 5                      | 6                     |
| RAN         | 5                      | 6                     |
| PTGES3      | 5                      | 5                     |
| AP1S2       | 5                      | 5                     |
| RHEB        | 5                      | 5                     |
| EIF4A1      | 4                      | 6                     |
| RAB7L1      | 4                      | 5                     |
| EEF1A1      | 4                      | 4                     |
| GSTK1       | 4                      | 4                     |
| RHOG        | 4                      | 4                     |
| ARPC4       | 4                      | 4                     |
| ARL6        | 4                      | 4                     |
| RAB6A       | 4                      | 4                     |
| RAB21       | 4                      | 4                     |
| RPL35       | 4                      | 4                     |
| CMPK1       | 4                      | 4                     |
| RPL18       | 3                      | 4                     |
| SURF4       | 3                      | 4                     |
| EIF3K       | 3                      | 3                     |
| AP1S1       | 3                      | 3                     |
| ARF6        | 3                      | 3                     |
| ARF4        | 3                      | 3                     |
| VAMP7       | 3                      | 3                     |
| ARF5        | 3                      | 3                     |

## Supplementary Figure 1. Pin1 is a binding partner of Kv4.2.

**a**, Silver stain showing the Kv4.2 complex isolated with a TAP-Kv4.2 pulldown assay in cultured hippocampal neurons. M: marker; Ctl: control. **b**, The numbers of unique and total peptides, and the percent (%) amino acid sequence coverage for each protein that are presented in hippocampal neurons. **c**, High molecular weight proteins that are identified by TAP-Kv4.2 pulldown assay in HEK-293T cells. **d**, Low molecular weight proteins that are identified by TAP-Kv4.2 pulldown assay in HEK-293T cells. **e**, Amino acid sequence coverage obtained for the (human) Pin1 protein from HEK-293T cells. **f**, Pin1 protein sequence report. Xcorr: Sequest cross-correlation score;  $\Delta$ corr: Xcorr difference between the top ranked and next best sequence.

**a**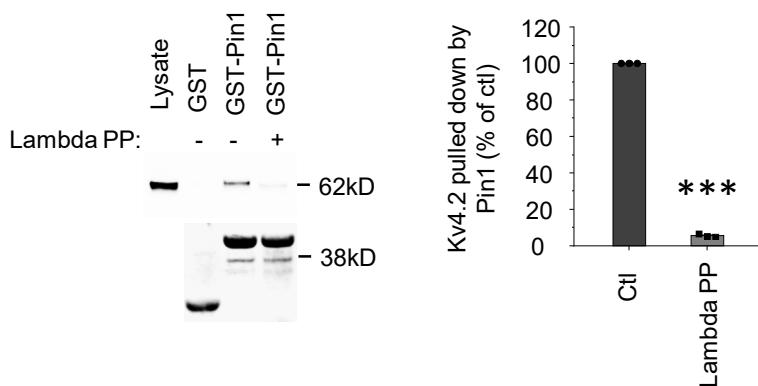**b**

Kv4.1 RDFVAAIISIP**TP**PANT**TP**DESQP**SP**GGGGRAGSTLRNSSLGTPCLFPETVKISSL

Kv4.2 PYVTTAIIISIP**TP**PVTT**TP**EGD**DR**PE**SP**EYSGGNIVRV**SAL**

Kv4.3 SQITTAIIISIP**TP**PAL**TP**EGES**R**PP**PAS**P**SP**GPNTNIPSIASNVVKV**SVL**

**c**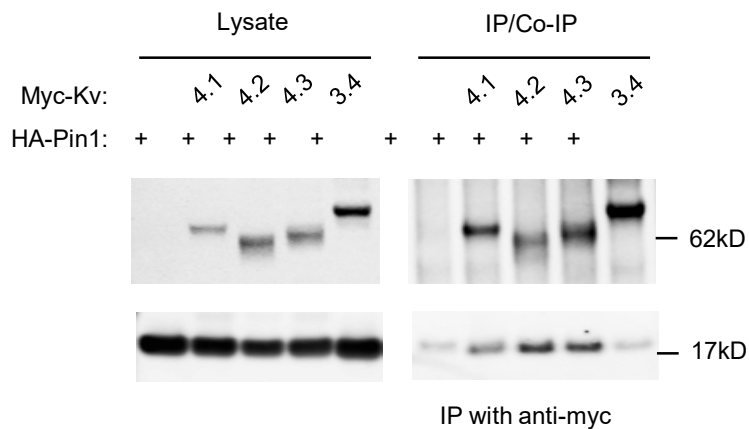

**Supplementary Figure 2. Pin1 binding to Kv4.2 is phosphorylation-dependent and Pin1 binds to A-type voltage-gated potassium channels.**

**a**, Lambda protein phosphatase treatment significantly reduced Kv4.2 pull-downed by GST-Pin1, suggesting Pin1 binding to Kv4.2 is phosphorylation-dependent.  $n = 3$  each group. Paired t-test,  $***p < 0.001$ . **b**, Alignment of C-terminal sequences of human A-type voltage-gated potassium channels. Note that the putative Pin1 binding site is conserved among Kv4 family members. Bold residues showed a preferred Pin1 binding context. **c**, Pin1 co-immunoprecipitated (co-IP) with Kv4 members but not Kv3.4 which doesn't contain the putative Pin1 binding site when expressed in HEK-293T cells. Data was repeated in three independent experiments. Data are presented as mean  $\pm$  SEM.

**a**

|               |                                         |
|---------------|-----------------------------------------|
|               | 602      607                            |
| Kv4.2 WT      | P T P P V T T P E G D D R P E S P E Y S |
| Kv4.2 T602A   | P A P P V T T P E G D D R P E S P E Y S |
| Kv4.2 T607A   | P T P P V T A P E G D D R P E S P E Y S |
| Kv4.2 T602,7A | P A P P V T A P E G D D R P E S P E Y S |

**b**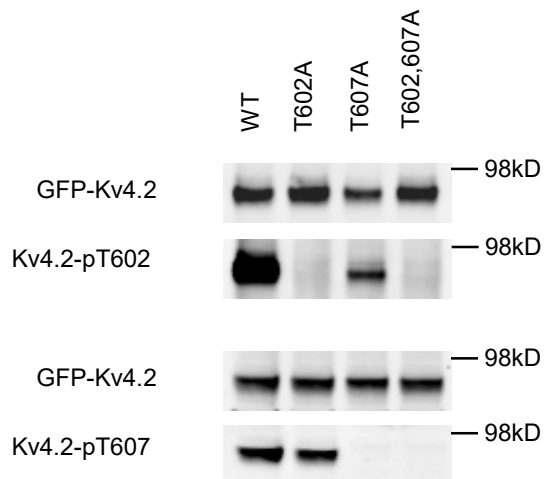**c**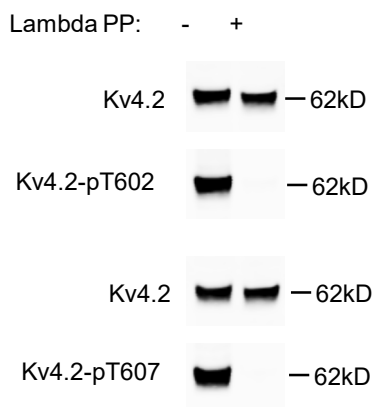

**Supplementary Figure 3. Characterization of Kv4.2 phosphorylation-specific antibodies with Kv4.2 mutants.**

**a**, Sequences of mutated Kv4.2 regions. **b**, Kv4.2 and its point mutants were transfected into HEK-293T cells. Detergent lysates were analyzed by Western blotting with phospho-specific antibodies. Phospho-T602 and phospho-T607 antibodies of Kv4.2 specifically recognize pT602 and pT607 respectively. Data was repeated in two independent experiments. **c**, Kv4.2 were treated with or without Lambda protein phosphatase (PP) before western blot. Phospho-T602 and phospho-T607 antibodies of Kv4.2 can only detect Lambda PP untreated Kv4.2. Data was repeated in three independent experiments.

**a**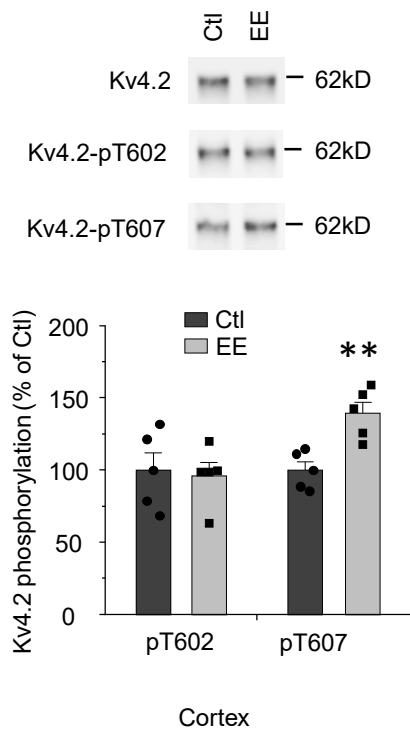**b**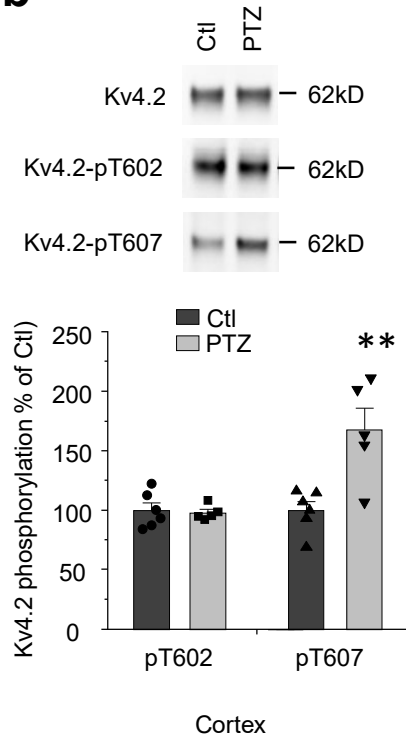

**Supplementary Figure 4. Enriched novel environment and seizure induce Kv4.2 phosphorylation in mouse cortex.**

**a**, Enriched novel environment (EE, 1hr) induces phosphorylation of Kv4.2 Thr607 but not Thr602 in mouse cortex. n = 5 in each group. **\*\*p < 0.01**. **b**, PTZ-induced seizure (50 mg / kg, i.p., 15 min) induces phosphorylation of Kv4.2 Thr607 but not Thr602 in mouse cortex. n = 6 for ctrl and 5 for PTZ. T-test, **\*\*p < 0.01**. Data are presented as mean  $\pm$  SEM.



**a**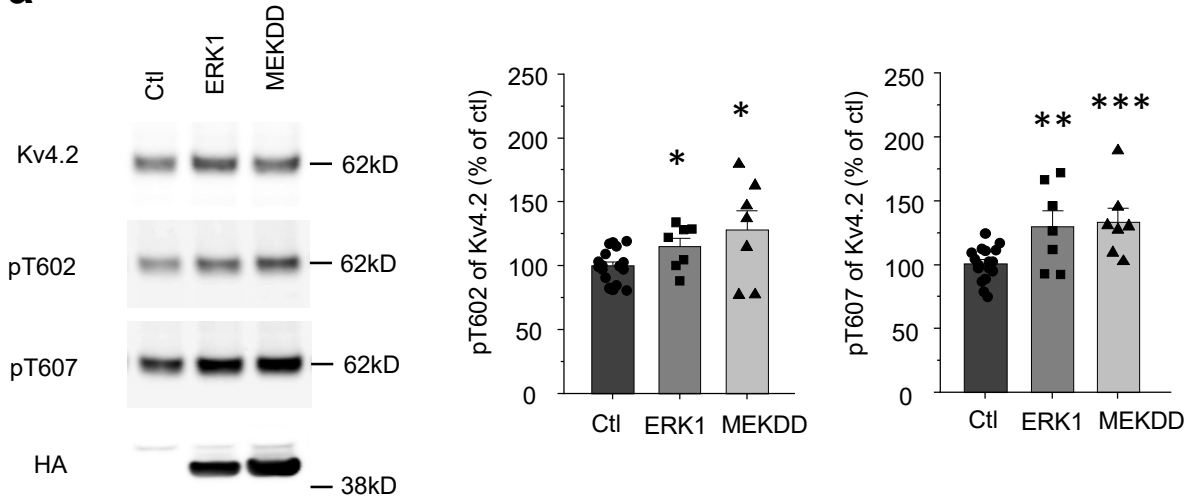**b**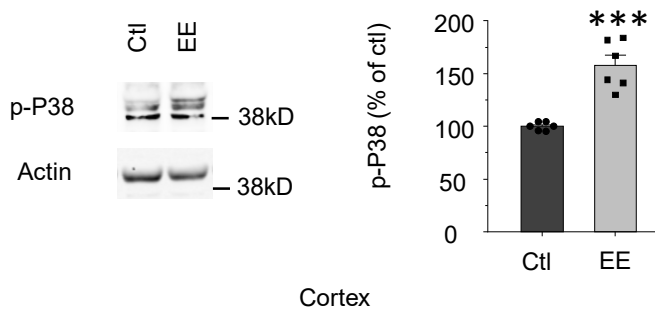

**Supplementary Figure 5. ERK phosphorylates Kv4.2 in HEK-293T cells and enriched novel environment activates p38 in mouse cortex.**

**a**, Kv4.2 and ERK1 or MEKDD (a constitutively active MEK mutant) constructs were co-transfected into HEK-293T cells. Lysates were analyzed by western blotting with anti-pT602 and anti-pT607 specific antibodies. n = 16 for ctl, 7 for ERK1 and MEKDD. \*p < 0.05, \*\*p < 0.01, \*\*\*p < 0.001. ERK1 and MEKDD increase Kv4.2 phosphorylation at T602 and T607, but to a small degree. **b**, EE induces the phospho-activation of p38 in mouse cortex. n = 6 in each group. T-test, \*\*\*p < 0.001. Data are presented as mean  $\pm$  SEM.

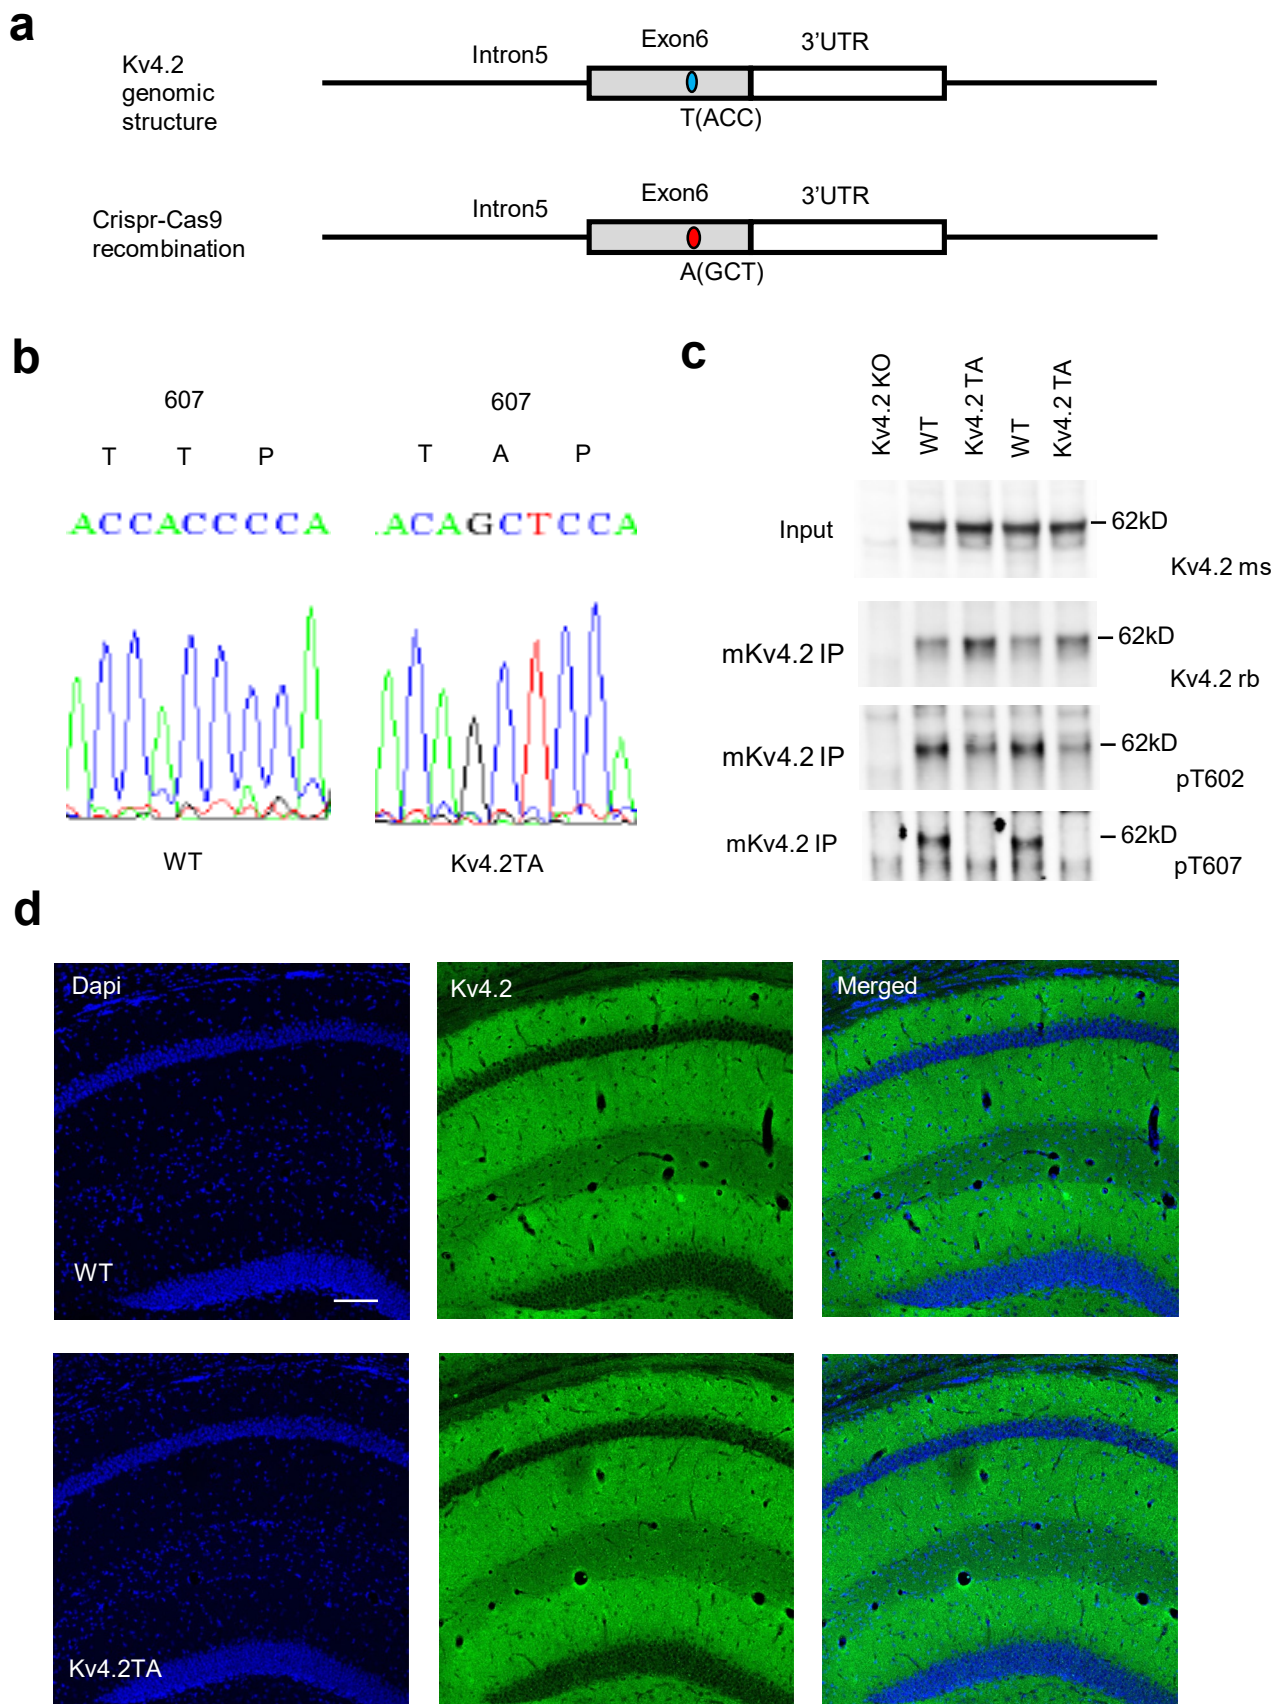

Supplementary Figure 6

## **Supplementary Figure 6. Kv4.2TA mouse generation.**

**a**, Strategy of Kv4.2 T607A mutant mouse (Kv4.2TA) generation. The mutation was introduced with the Crispr-Cas9 technique. **b**, Genomic DNA was extracted and PCR products were purified for sequencing. Sequencing data verified the mutations were produced as intended. **c**, Brain lysates from WT and Kv4.2TA mice were incubated with Kv4.2 antibody. IP samples were blotted with pT602 and pT607 antibodies. Phosphorylation of Kv4.2 T607 was disrupted in Kv4.2TA mice. The pT602 level is reduced in Kv4.2TA mice, probably because of the decrease of pT602 antibody recognition or pT607's impact on pT602. Data was repeated in three independent experiments. **d**, Immunostaining of Kv4.2 in WT and Kv4.2TA brain showing the Kv4.2 expression pattern was not altered in Kv4.2TA hippocampus. Scale bars: 100  $\mu$ m. Data was repeated in four independent experiments.

**a**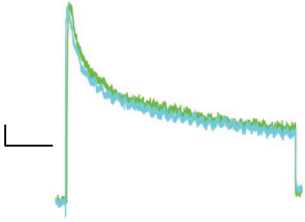**b**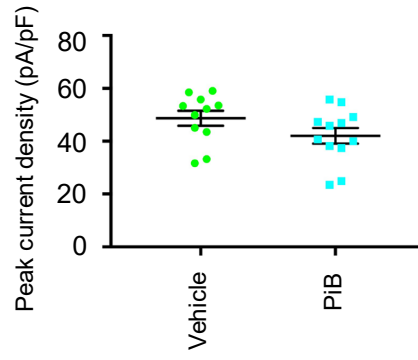**c**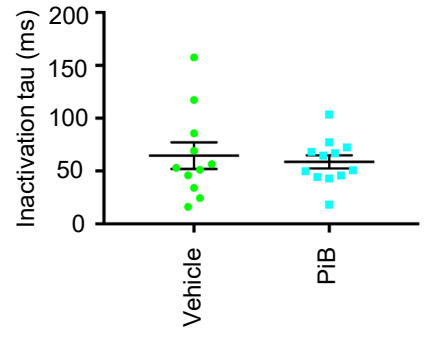

**Supplementary Figure 7. Pin1 inhibition with PiB has no effect on A-current in Kv4.2TA mice.**

**a**, Trace of transient  $I_A$  in response to PiB (4  $\mu$ M) treatment in Kv4.2TA. Inactivating  $I_A$  was isolated by subtracting total  $K^+$  measured from a step to +40 mV from a -120 mV pre-pulse from a subsequent step to +40 mV from -30 mV. Scale: 10 pA / 100 ms. **b**,  $I_A$  density in outside-out patches is not affected by PiB treatment in Kv4.2TA mice (n = 11 for vehicle, 12 for PiB), unpaired two-tailed T-test,  $p > 0.05$ . **c**, No significant difference in decay kinetics was observed in response to the treatment and vehicle control, unpaired two-tailed T-test,  $p > 0.05$ . Data are presented as mean  $\pm$  SEM.

**a**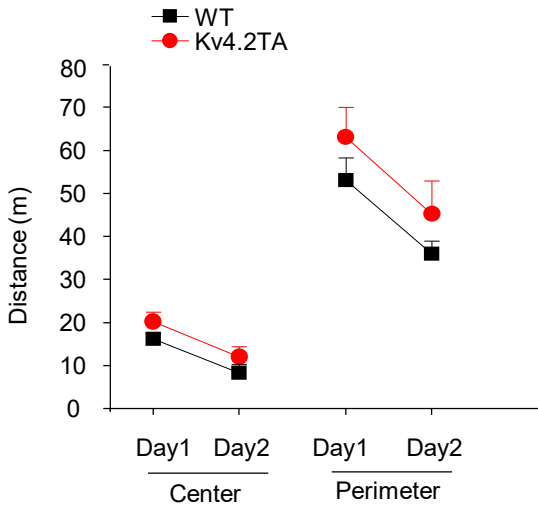**b**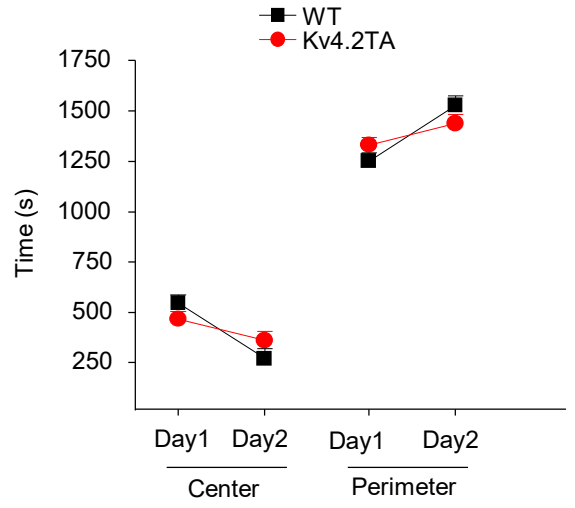

**Supplementary Figure 8. Kv4.2TA mice showed normal motor activity in open field test.**

**a**, Total distance traveled in various regions of the open field apparatus by WT and Kv4.2TA mice. The mice were tested for 30 min sessions on two consecutive days. **b**, Time spent in the center or perimeter of the open field apparatus. n = 12 for WT, 16 for Kv4.2TA. Data are presented as mean  $\pm$  SEM.



| Parameter                           | WT (mean $\pm$ SEM; n)  | Kv4.2TA (mean $\pm$ SEM; n) |
|-------------------------------------|-------------------------|-----------------------------|
| Rise time (ms)                      | 11.69 $\pm$ .74; n=14   | 11.27 $\pm$ 1.06; n=15      |
| Half-activation ( $V_{1/2}$ ) (mV)  | 24.76 $\pm$ 3.47; n=12  | 34.74 $\pm$ 4.2; n=11       |
| Half-activation (k) (mV)            | 18.74 $\pm$ 74; n=12    | 19.94 $\pm$ 1.14; n=11      |
| Half-inactivation ( $V_{1/2}$ )(mv) | -61.77 $\pm$ 1.57; n=13 | -64.55 $\pm$ 2.42; n=9      |
| Half-inactivation (k) (mV)          | 4.60 $\pm$ 1.00; n=13   | 5.97 $\pm$ 0.83; n=9        |

**Supplementary Table 1.** Outside-out somatic patch recordings of A-current. Inactivation kinetics, rise time and voltage dependence of activation and inactivation.

Fig. 1a

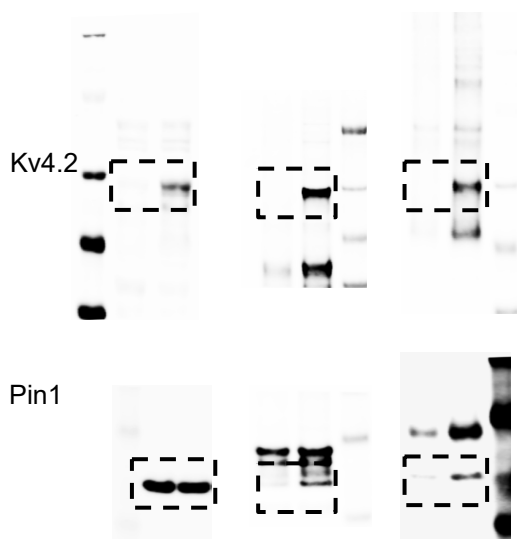

Fig. 1c

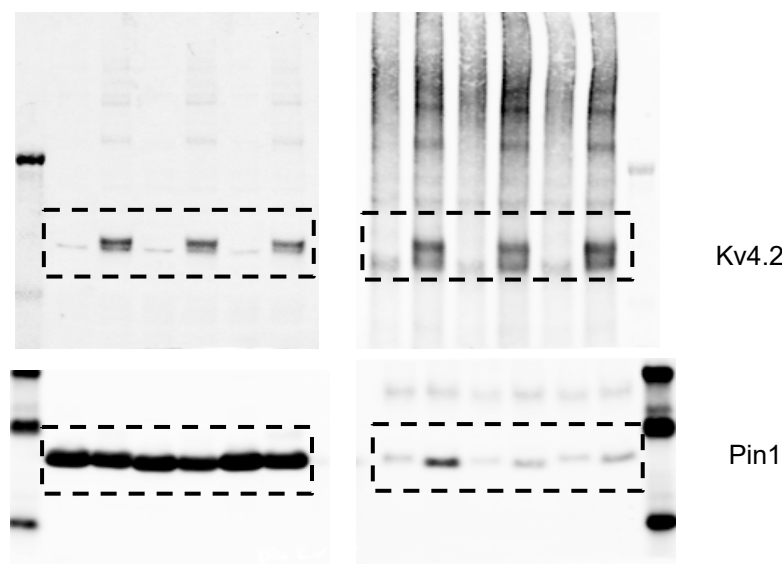

Fig. 1e

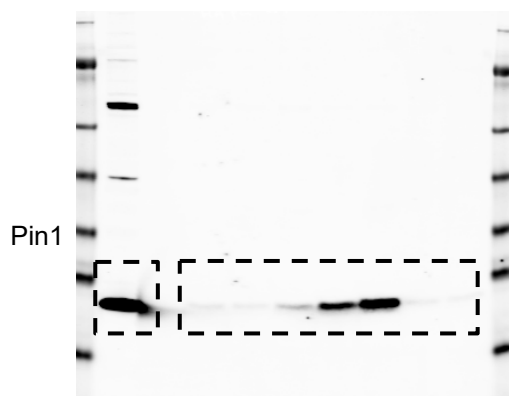

Fig. 1f

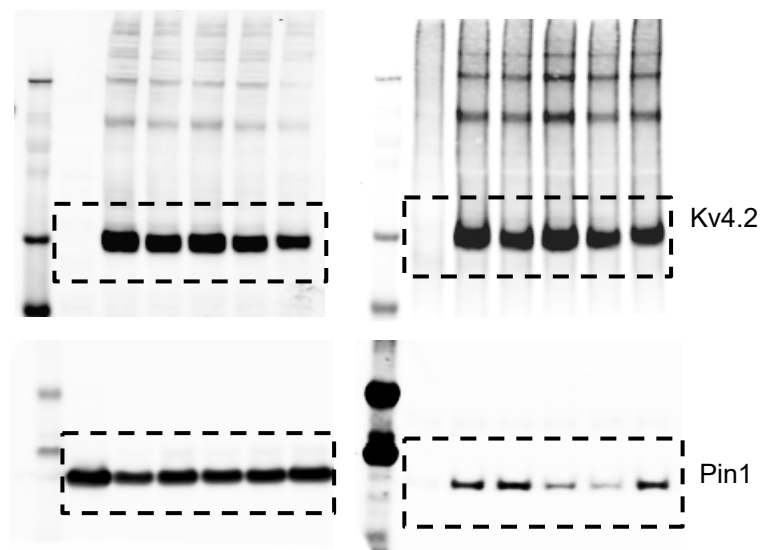

Fig. 1j

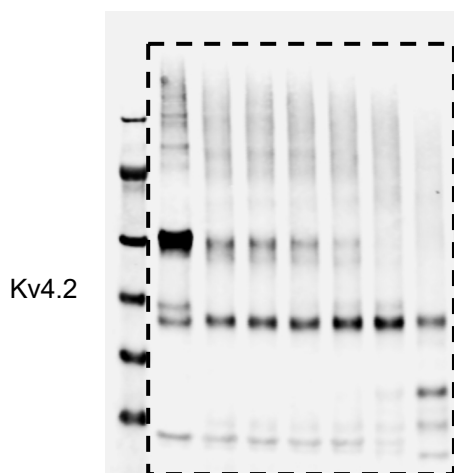

Fig. 1k

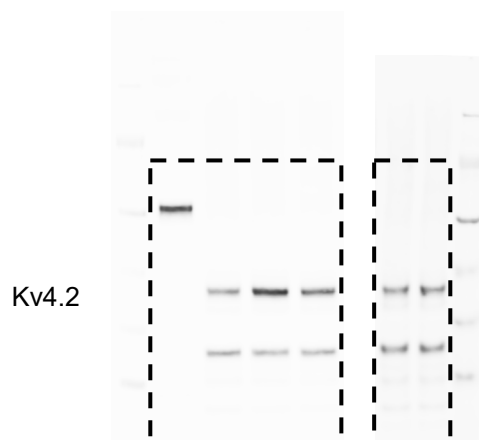

Fig. 2a

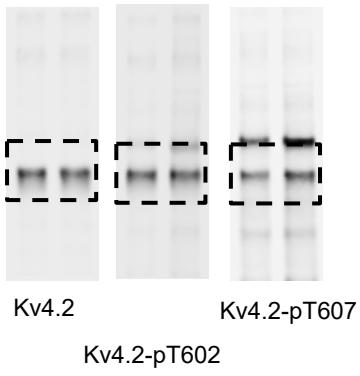

Fig. 2b

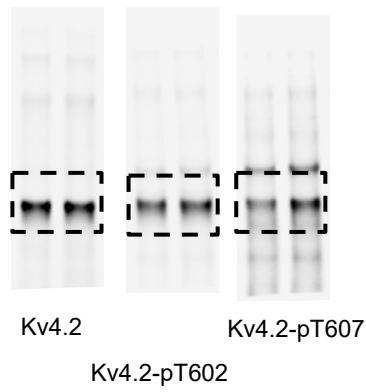

Fig. 2c

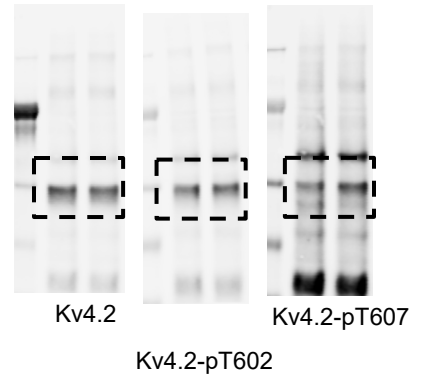

Fig. 2d

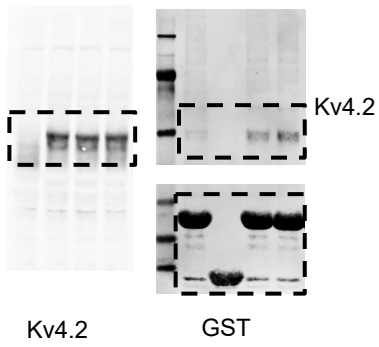

Fig. 2e

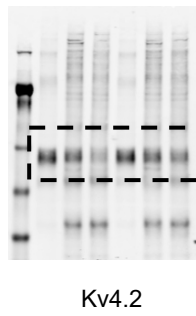

Fig. 2f

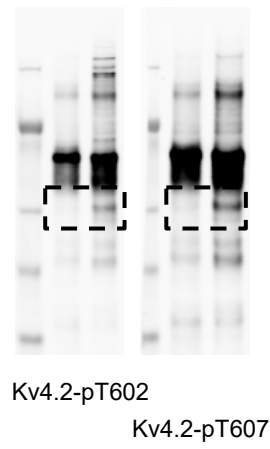

Fig. 2g

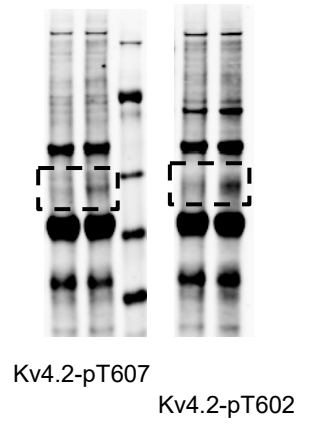

Fig. 3a

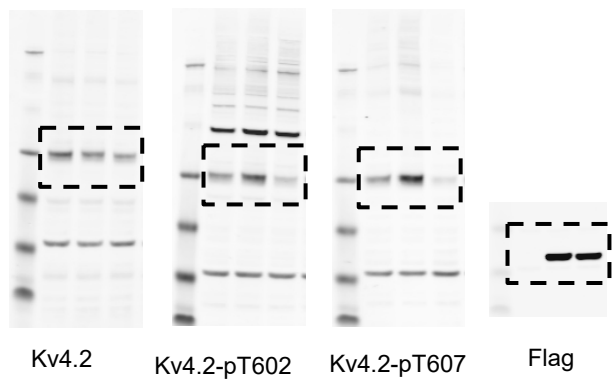

Fig. 3b

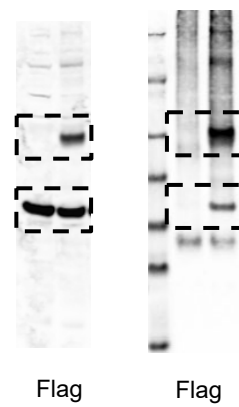

Fig. 3c

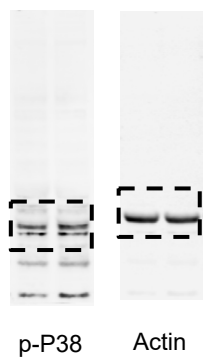

Fig. 3d

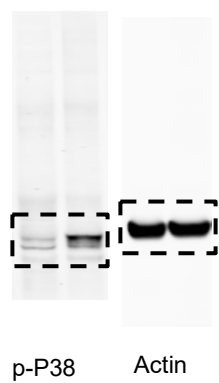

Fig. 3e

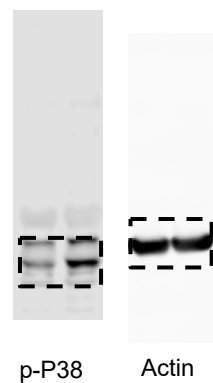

Fig. 3f

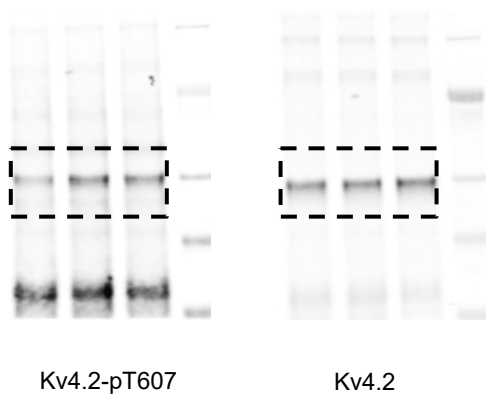

Fig. 3g

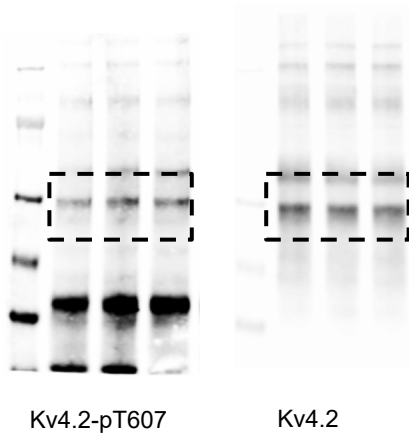

Fig. 4a

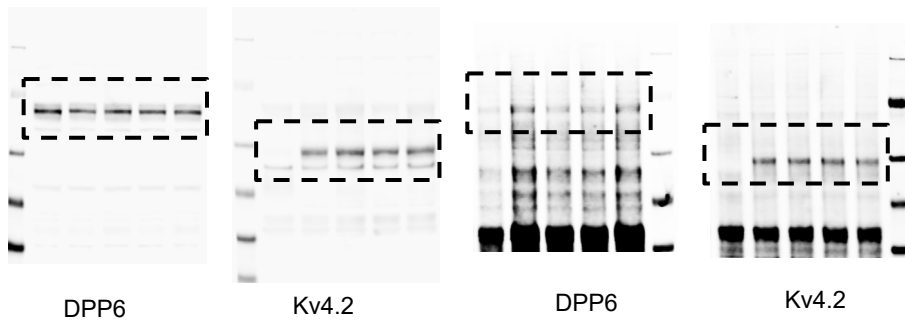

Fig. 4b

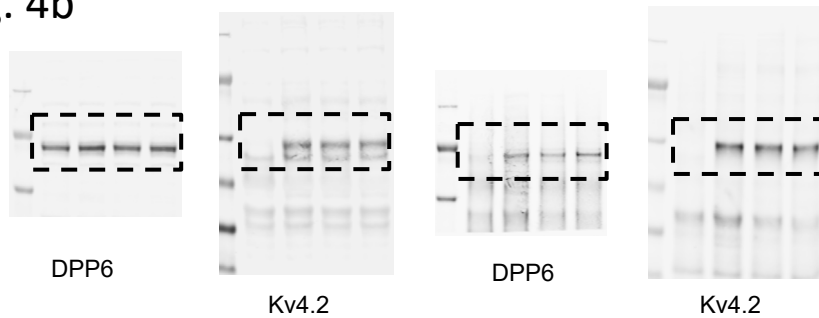

Fig. 4c

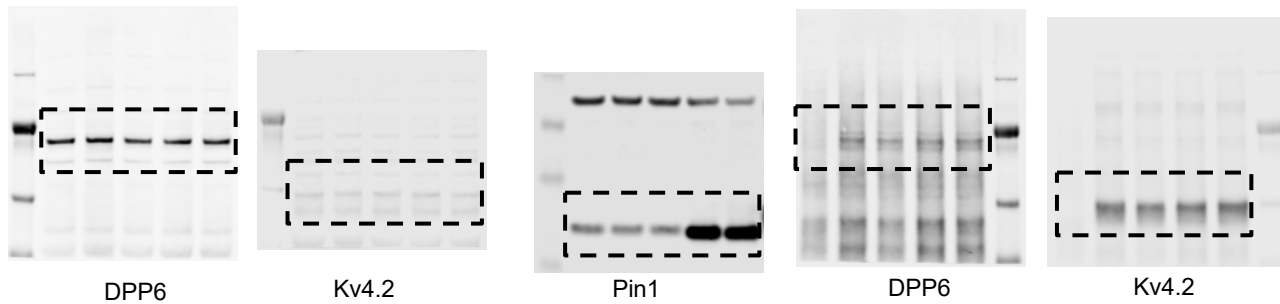

Fig. 4d

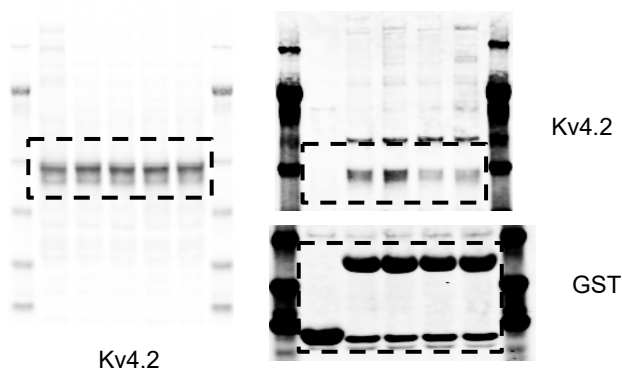

Fig. 4e

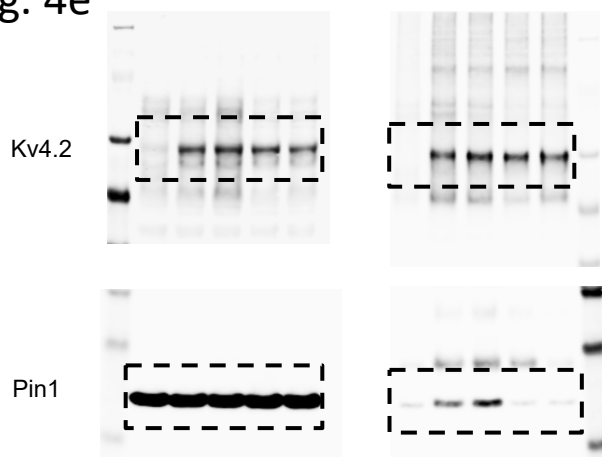

Fig. 4F

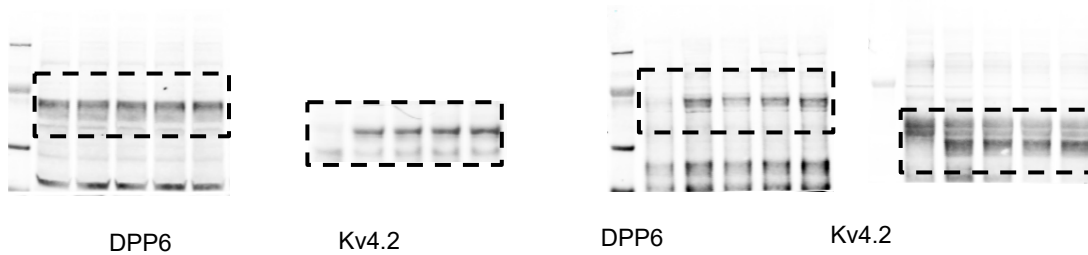

Fig. 5g

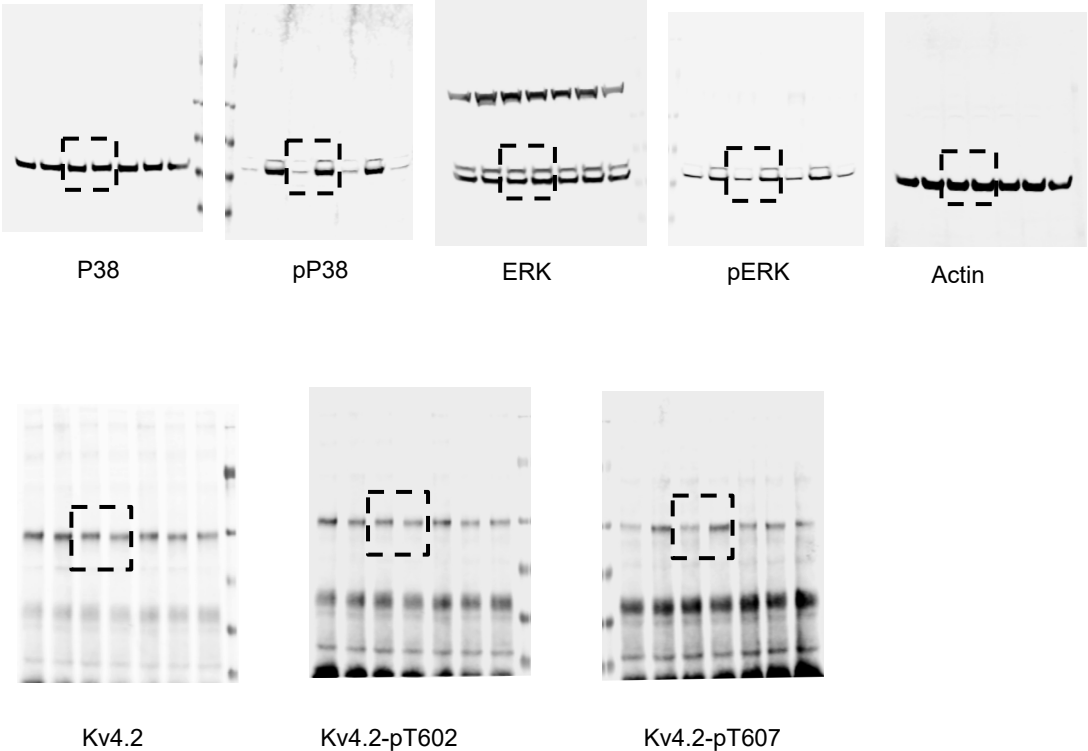

## Supplementary Fig. 2a

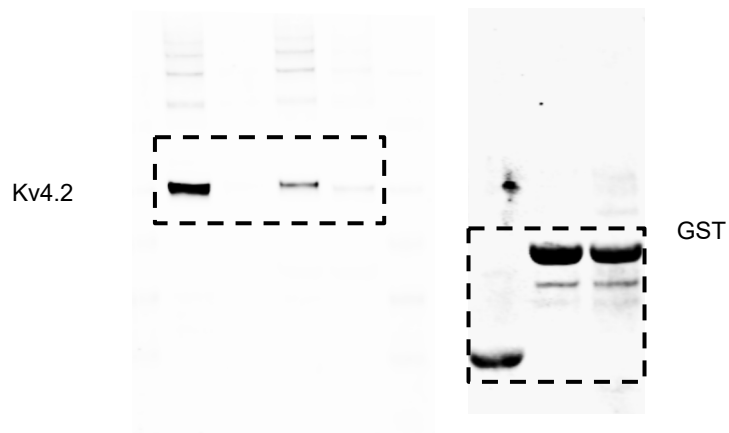

## Supplementary Fig. 2b

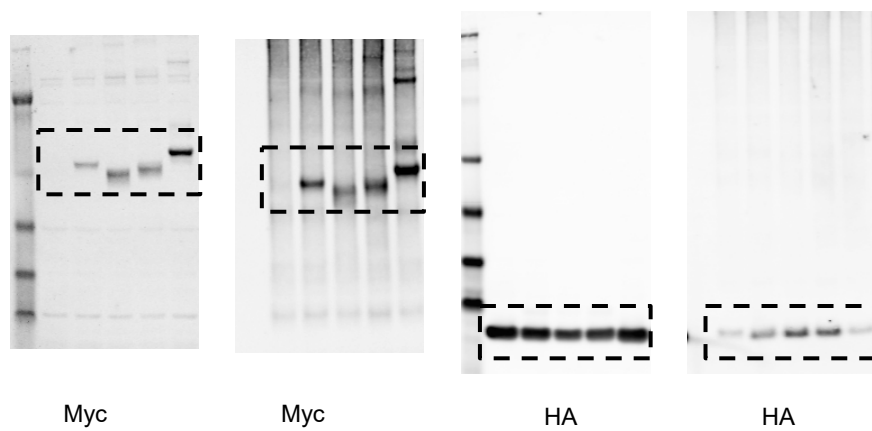

## Supplementary Fig. 3b

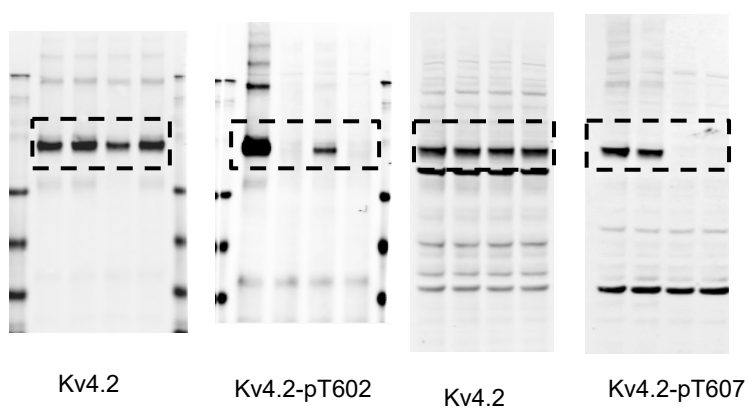

## Supplementary Fig. 3c

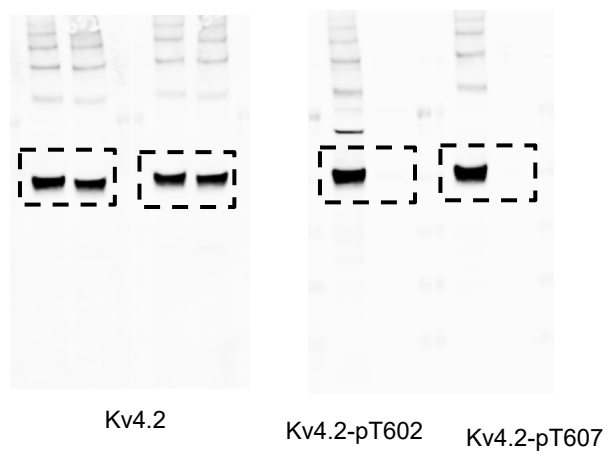



Supplementary Fig. 4a

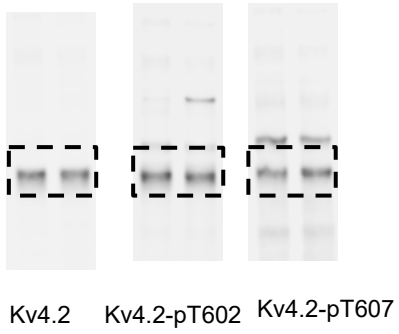

Supplementary Fig. 4b

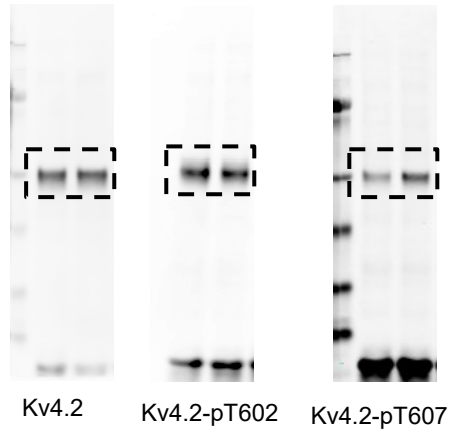

Supplementary Fig. 5b

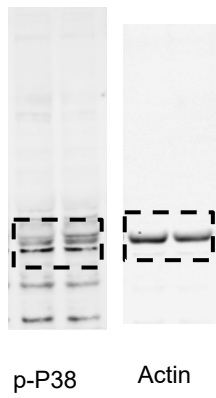

# Supplementary Fig. 6c

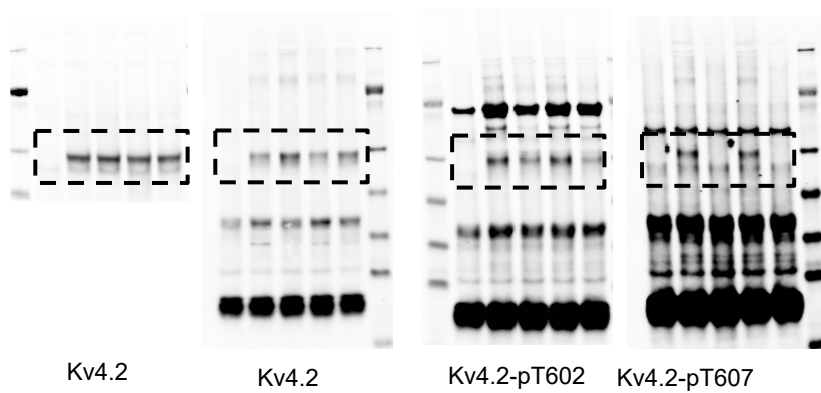

Supplement: 41467_2020_15390_MOESM1_ESM.pdf [file 41467_2020_15390_MOESM1_ESM.pdf]
